# Supplementary material for: Tumor-associated macrophages promote pancreatic ductal adenocarcinoma progression by inducing epithelial-to-mesenchymal transition
Source: publisher site journal article supplement (doi:10.18632/aging.202264), 2021-01-10
Supplement: Supplementary file [file aging-v13i3-202264-supplementary-material-SD1.pdf]

## SUPPLEMENTARY FIGURES

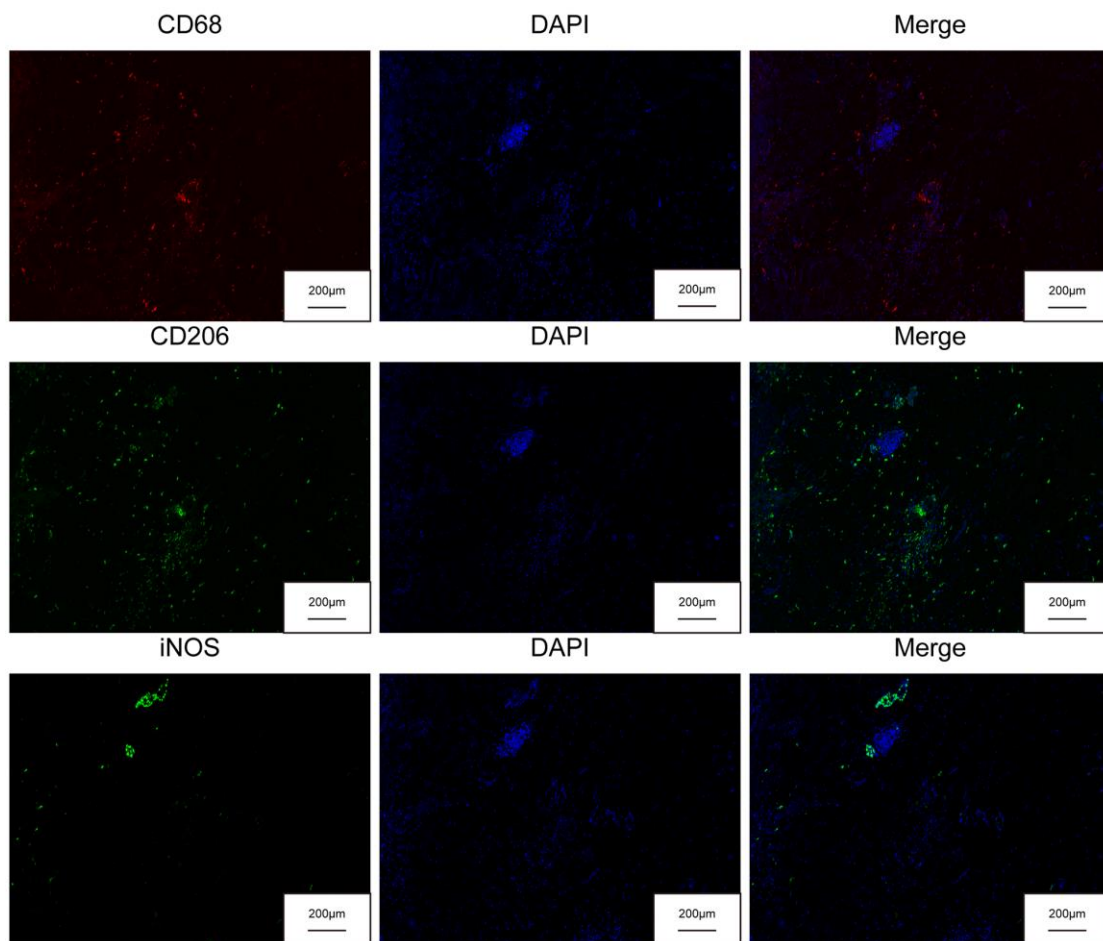

Supplementary Figure 1. Representative fluorescence microscopy images show the staining of CD68, iNOS, and CD206 in the PDAC tissues (Scale bar = 200 µm).

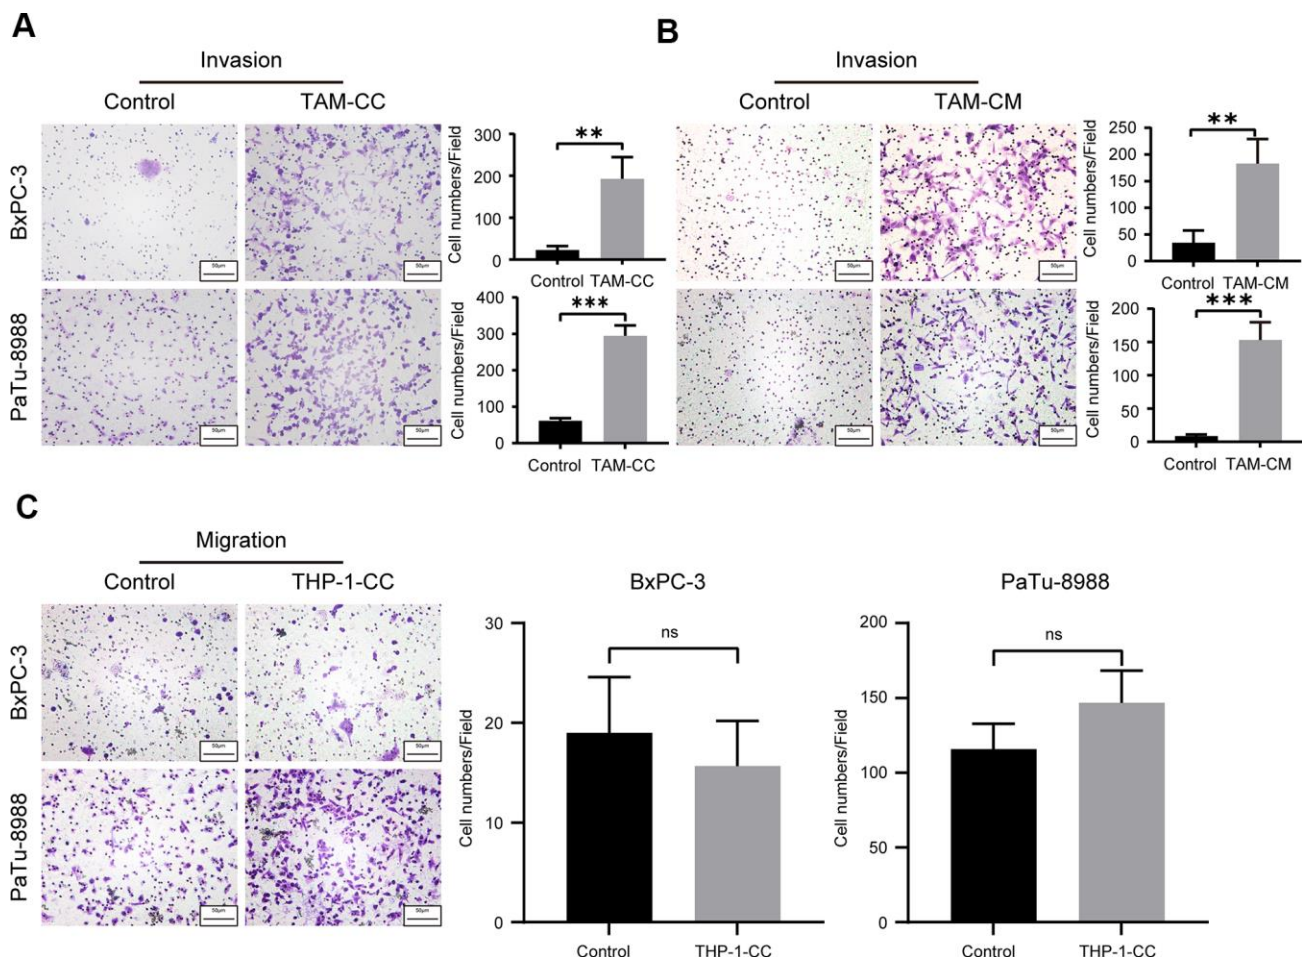

**Supplementary Figure 2.** (A) Transwell assay results show invasiveness of BxPC-3 and PaTu-8988 cells that are co-cultured with TAMs (TAM-CC). Scale bar = 50  $\mu$ m; \*\*P < 0.01, \*\*\*P < 0.001. (B) Transwell assay results show invasiveness of BxPC-3 and PaTu-8988 cells after treatment with TAM-CM. Scale bar = 50  $\mu$ m, \*\*P < 0.01, \*\*\*P < 0.001. (C) Transwell assay results show migration ability of BxPC-3 and PaTu-8988 cells that are co-cultured with THP-1 cells. Scale bar = 50  $\mu$ m.

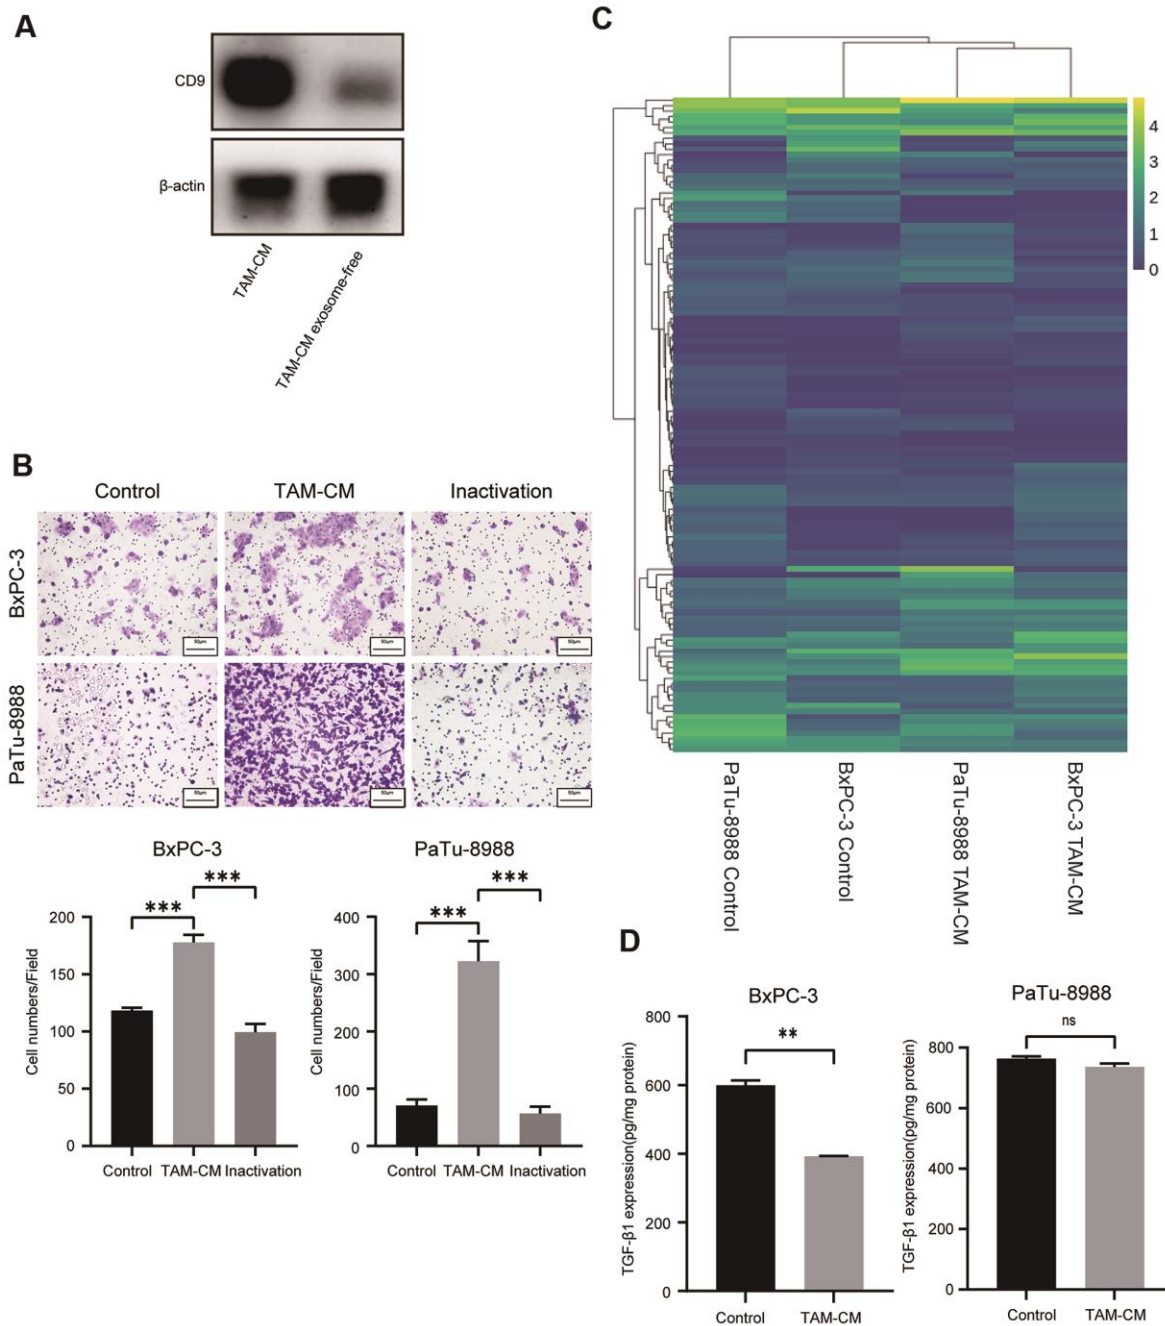

**Supplementary Figure 3.** (A) Western blot analysis shows the levels of exosome marker proteins CD9 in TAM-CM and exosome-free TAM-CM. (B) The heatmap shows 121 differentially expressed genes in the TAM-CM treated BxPC-3 and PaTu-8988 cells compared to the corresponding controls. (C) Transwell assay results show migration and invasiveness of BxPC-3 and PaTu-8988 cells incubated with normal TAM-CM or inactivated TAM-CM. Scale bar = 50  $\mu$ m; \*\*\* $P$  < 0.001. (D) ELISA analysis shows the levels of TGF- $\beta$ 1 secreted by BxPC-3 or PaTu-8988 cells incubated with or without TAM-CM. \*\* $P$  < 0.01.

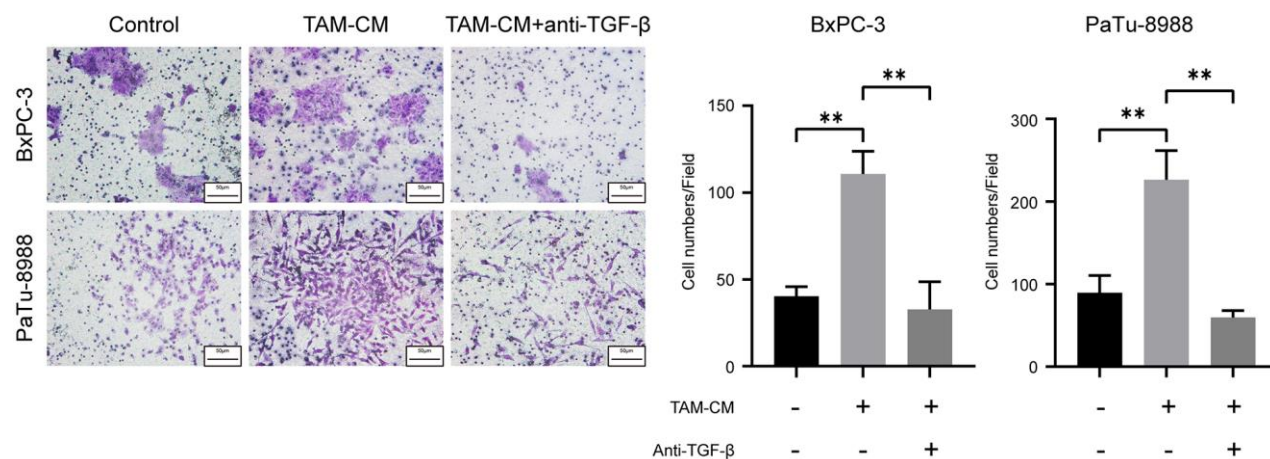

**Supplementary Figure 4.** Transwell assays show the invasiveness of BxPC-3 and PaTu-8988 cells incubated with TAM-CM in presence or absence of the neutralizing TGF- $\beta$  antibody. Scale bar = 50  $\mu$ m; \*\*P < 0.01.
